# Supplementary material
Source: PubMed Central journal article supplement (PMC7476272)
Supplement: heartjnl-2020-317355supp001.pdf [file heartjnl-2020-317355supp001.pdf]

## Supplementary Appendix

**Supplementary Table 1 – Multivariable logistic regression analysis for the primary endpoint (in-hospital all-cause mortality or ICU admission).**

|                                                          | <b>OR<sub>adj</sub></b> | <b>95% CI</b> | <b>p-value</b> |
|----------------------------------------------------------|-------------------------|---------------|----------------|
| Pulmonary hypertension                                   | 4.98                    | 1.24-19.94    | <b>0.023</b>   |
| Age (years)                                              | 1.03                    | 0.98-1.08     | 0.206          |
| Male sex                                                 | 2.49                    | 0.65-9.62     | 0.184          |
| CXR severity score $\geq 4$                              | 11.90                   | 2.49-56.81    | <b>0.002</b>   |
| High-sensitivity troponin T (ng/L)                       | 1.00                    | 0.98-1.01     | 0.724          |
| PaO <sub>2</sub> /FiO <sub>2</sub> on hospital admission | 0.99                    | 0.99-1.00     | 0.052          |

Data are presented as OR<sub>adj</sub> and 95% CI. The C-statistic for the multivariable model is 0.889, the Hosmer-Lemeshow goodness-of-fit test p-value is 0.978.

CI – confidence interval; CXR – chest X-ray; ICU – intensive care unit; OR<sub>adj</sub> – adjusted odds ratio.
